# Supplementary material for: Effects of copper on chemical kinetics and brown carbon formation in the aqueous ˙OH oxidation of phenolic compounds
Source: Royal Society of Chemistry journal article supplement (doi:10.1039/d4em00191e), 2024-01-01
Supplement: d4em00191e1.pdf [file d4em00191e1.pdf]

1 **Supplementary Information**

2 **Effects of Copper on the Chemical Kinetics and Brown Carbon Formation in the Aqueous**

3 **•OH oxidation of Phenolic Compounds**

4 Junwei Yang,<sup>1,2</sup> Tianye Zhou,<sup>1</sup> Yuting Lyu,<sup>1,2</sup> Beatrix Rosette Go Mabato,<sup>1</sup> Jason Chun-Ho  
5 Lam,<sup>1,2</sup> Chak K. Chan,<sup>3</sup> Theodora Nah<sup>1,2\*</sup>

6 <sup>1</sup>*School of Energy and Environment, City University of Hong Kong, Hong Kong SAR, China*

7 <sup>2</sup>*State Key Laboratory of Marine Pollution, City University of Hong Kong, Hong Kong SAR, China*

8 <sup>3</sup>*Division of Physical Science and Engineering, King Abdullah University of Science and Technology, Kingdom  
9 of Saudi Arabia*

10

11 \* *To whom correspondence should be addressed: Theodora Nah (Email: theodora.nah@cityu.edu.hk, Tel: +852  
12 3442 5578)*

13

14

15

16

17

18

19

20

21

22

23

24

25

26

27

28

## 29 Section S1. Assessing the effectiveness of the EDTA addition to extracted sample aliquots

30 Previous studies added EDTA to their samples to quench reactions initiated by Cu-  
31 catalyzed H<sub>2</sub>O<sub>2</sub> decomposition,<sup>1, 2</sup> but these studies did not specify the pH conditions of their  
32 solutions. We observed that the addition of EDTA alone to the extracted sample aliquots still  
33 led to substantial degradations of the PhCs. In contrast, the addition of EDTA acidified to pH  
34 2 with H<sub>2</sub>SO<sub>4</sub> to the extracted sample aliquots did not lead to substantial degradations of the  
35 PhCs even though the measurements took place after 18 h of storage at 4 °C. Here, 18 h was  
36 chosen as the threshold storage time in our tests after considering the typical wait times  
37 encountered to obtain access to the department's communal UPLC-PDA system for our PhC  
38 measurements. As shown in Figure S1, over our kinetics experimental timescale, the  
39 concentrations of the PhCs in experiments where acidified EDTA was added to the extracted  
40 sample aliquots and then analyzed after 18 h of storage at 4 °C were close to those of which  
41 the PhCs in the extracted sample aliquots were measured immediately without the addition of

42 EDTA. Consequently, their  $\frac{[PhC]_t}{[PhC]_0}$  values were pretty close regardless the reaction time. In  
43 contrast, the measured PhC concentrations were substantially lower when non-acidified EDTA  
44 was added to the extracted sample aliquot, thus resulting in substantially lower  $\frac{[PhC]_t}{[PhC]_0}$  values.  
45 Thus, in photooxidation and dark experiments aimed at measuring the decay kinetics of the  
46 PhC in solutions containing CuSO<sub>4</sub> and H<sub>2</sub>O<sub>2</sub>, EDTA acidified to pH 2 with H<sub>2</sub>SO<sub>4</sub> was added  
47 immediately to the extracted sample aliquots to quench the reaction prior to UPLC-PDA  
48 analysis. Additionally, the quenched extracted samples were analyzed within 18 h.

## 49 Section S2. SPE protocol

50 SPE was immediately performed on the extracted sample aliquots using SPE cartridges  
51 (HLB, 200 mg, 6 cm<sup>3</sup>, 30 μm, Waters) to desalt the samples prior to UPLC-MS analysis: The  
52 SPE cartridge was first activated and conditioned by filling it with 2 mL methanol and 2 mL  
53 ultrapure water. After that, the extracted 3 mL sample aliquot was loaded to the SPE cartridge.  
54 Next, the cartridge was flushed by adding 9 mL ultrapure water and dried by flushing air  
55 through the cartridge using an air pump. Finally, the elution was conducted by the addition of  
56 6 mL acetonitrile and dried with flushing air. The eluted acetonitrile with organic compounds  
57 was diluted with 6 mL purified water, filtered using 0.22 μm pore size FTPE filters (Tianjin

58 Jinteng Experiment Equipment Co., Ltd., Tianjin, China), and collected for UPLC-MS  
59 analysis.

### 60 **Section S3. UPLC-MS measurements of 4-hydroxybenzoic acid**

61 4-hydroxybenzoic acid was measured using an ultra-high performance liquid  
62 chromatography system (1290 Infinity LC, Agilent) coupled to a high-resolution quadrupole-  
63 time-of-flight mass spectrometer (Sciex X500R QTOF) equipped with an ESI source that was  
64 operated in negative mode. All the extracted 3 ml aliquots were desalted using the SPE  
65 procedure described in Section S1. A reverse phase Kinetex (Phenomenex) PS-C18 column  
66 ( $150 \times 2.1$  mm,  $2.6 \mu\text{m}$ ,  $100 \text{ \AA}$ ) equipped with a security guard and a PS-C18 pre-column was  
67 used for the UPLC-MS analysis. The temperatures for the column oven and the UPLC  
68 autosampler were set to  $25 \text{ }^\circ\text{C}$ . A gradient elution program was used. The binary mobile phases  
69 consisted of eluent A (10 mM ammonium acetate) and eluent B (acetonitrile) delivered at a  
70 flow rate  $300 \mu\text{L min}^{-1}$ . The sample injection volume was set to  $10 \mu\text{L}$ . The following mobile  
71 phase gradient was used: 0 to 3 min 1% B, 3 to 5 min linear gradient to 80% B, 5 to 6 min 80%  
72 B, 6 to 6.5 min linear gradient to 1% B, 6.5 to 7 min 1% B. The following tandem MS  
73 conditions were used:  $-4500 \text{ V}$  ESI ion spray voltage,  $-80 \text{ V}$  declustering potential,  $-15 \text{ V}$   
74 collision energy, 25 PSI curtain gas, and  $450 \text{ }^\circ\text{C}$  source temperature.

### 75 **Section S4. UPLC-MS data processing and analysis of products from dark oxidation and** 76 **photooxidation experiments**

77 The raw UPLC-MS data first underwent preprocessing using the open-source HR-MS  
78 workflow R package, patRoön. The program uses the open-source software library, OpenMS,  
79 for the automatic identification of chromatographic peaks. The following feature finding  
80 settings were used: the noise intensity threshold ("noise\_threshold\_int") was set to 200, the  
81 signal to noise ratio was set to 5, and an allowed mass deviation of 10 ppm was set. The settings  
82 were selected based on a balance between quantity and quality of the extracted peaks, with  
83 consideration given to the total number of peaks while minimizing the effects from noise.  
84 Similar peaks that were found across samples were grouped. The resulting feature groups were  
85 filtered based on their peak intensities and ubiquitous presence in replicates. In addition, only  
86 peaks with signal intensities that were at least three times higher than those of the sample blanks  
87 were included. The molecular formulas for all the feature groups were calculated automatically,  
88 using the "generateMSpeakLists" function from the patRoön R package. This generated MS  
89 peak lists from the feature groups. This function utilized the mzR package to obtain the MS

90 and MS/MS spectra, which were then averaged and filtered. Candidate formulas were then  
91 calculated for the feature groups using the "generateFormulas" function, which relied on the  
92 open-source package, GenForm. GenForm generated molecular formulas for the high-  
93 resolution MS and MS/MS data by using the accurate mass of the feature groups to calculate  
94 candidate formulas. The candidate formulas were scored based on matched  
95 theoretical/measured isotopic patterns, and only formulas that met the basic chemical criteria  
96 were included. The formula calculations included C, H, and O atoms.

97

98

99

100

101

102

103

104

105

106

107

108

109

110

111

112

113

114

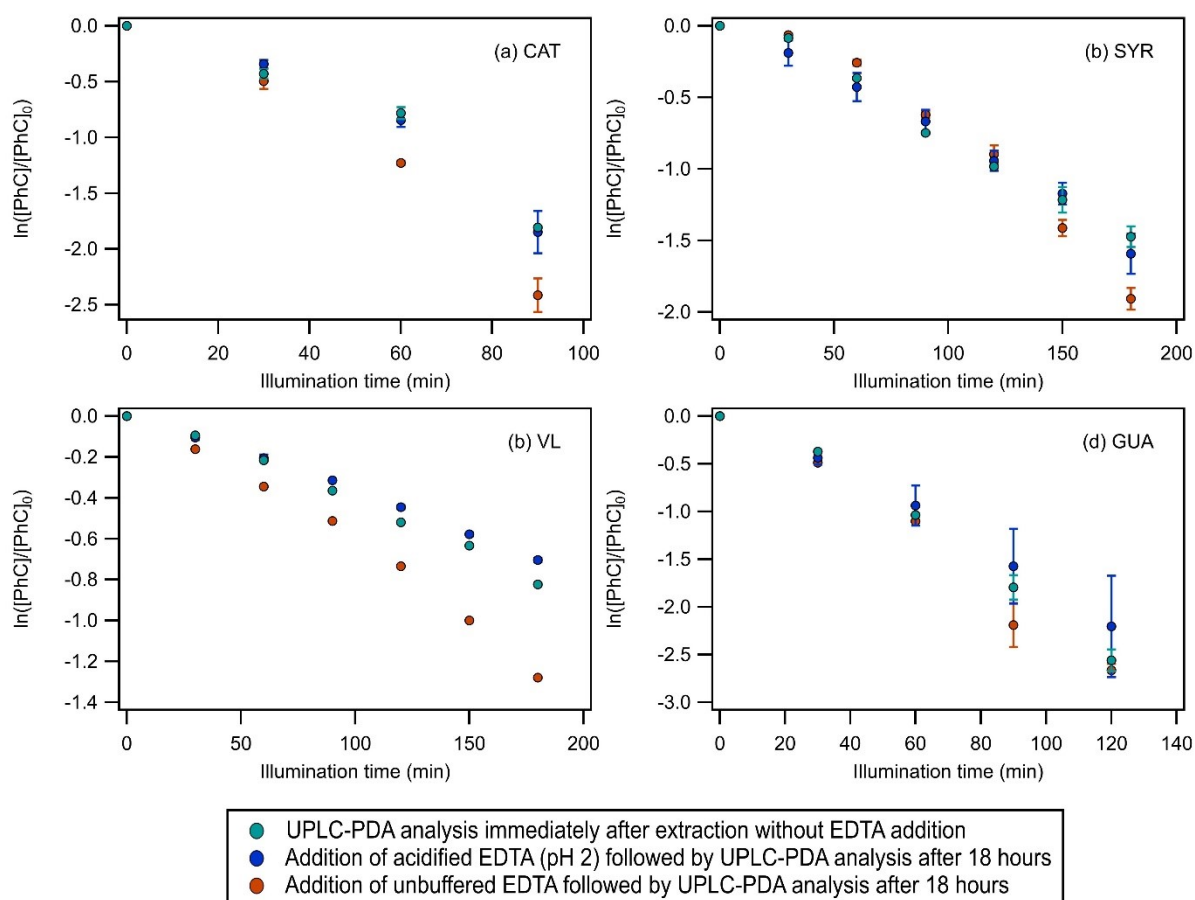

116

117 **Figure S1.** Evaluation of the use of acidified EDTA to quench reactions during the  
 118 photooxidation of (a) catechol (CAT), (b) syringol (SYR), (c) vanillin (VL), and (d) guaiacol  
 119 (GUA) initiated by  $H_2O_2$  decomposition in the presence of Cu(II). Error bars indicate  
 120 deviations from triplicate measurements.

121

122

123

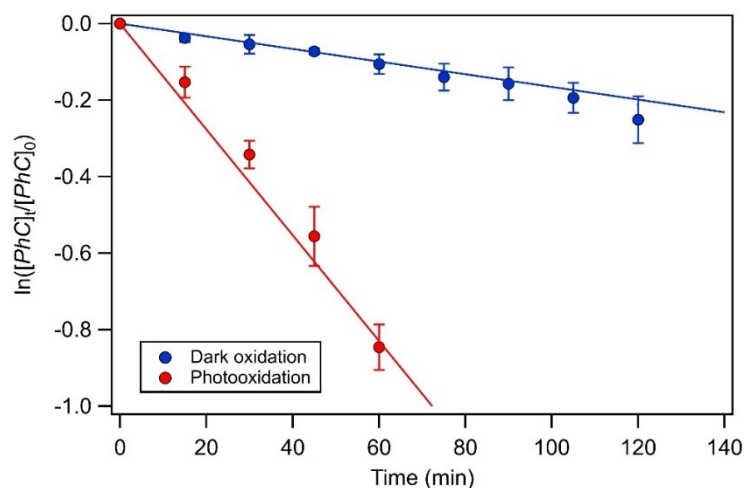

124

125 **Figure S2.** Decays of catechol in dark oxidation and photooxidation experiments utilizing  
 126 solutions containing catechol, 50  $\mu\text{M}$  of Cu(II), and 500  $\mu\text{M}$  of  $\text{H}_2\text{O}_2$  at pH 5.5. Lines show the  
 127 exponential fits to the initial decays. Error bars indicate standard deviations from triplicate  
 128 experiments and measurements. Similar kinetic analyses were conducted for the four PhCs. In  
 129 dark experiments, time = 0 min is the time point at which Cu(II) was added into the solution.  
 130 In photooxidation experiments, time = 0 min is the time point immediately before the solutions  
 131 were exposed to light in the photoreactor. All the decays were fitted using equation (1).

132

133

134

135

136

137

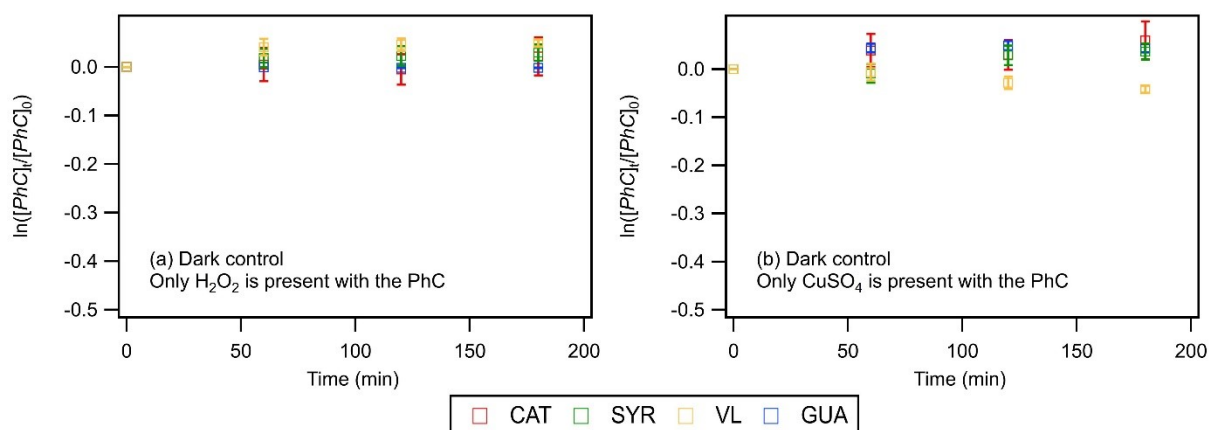

138

139 **Figure S3.** The  $\ln\left(\frac{[PhC]_t}{[PhC]_0}\right)$  values for catechol (CAT), syringol (SYR), vanillin (VL), and  
 140 guaiacol (GUA) at pH 2 and 5.5 in dark control experiments where (a) only  $H_2O_2$  was present  
 141 in solutions but not Cu(II), and (b) only Cu(II) was present in the solution but not  $H_2O_2$ . Error  
 142 bars indicate standard deviations from triplicate measurements. The  $\ln\left(\frac{[PhC]_t}{[PhC]_0}\right)$  values were  
 143 close to 1 at the different time points, indicating that the PhC decays were insignificant in the  
 144 dark control experiments.

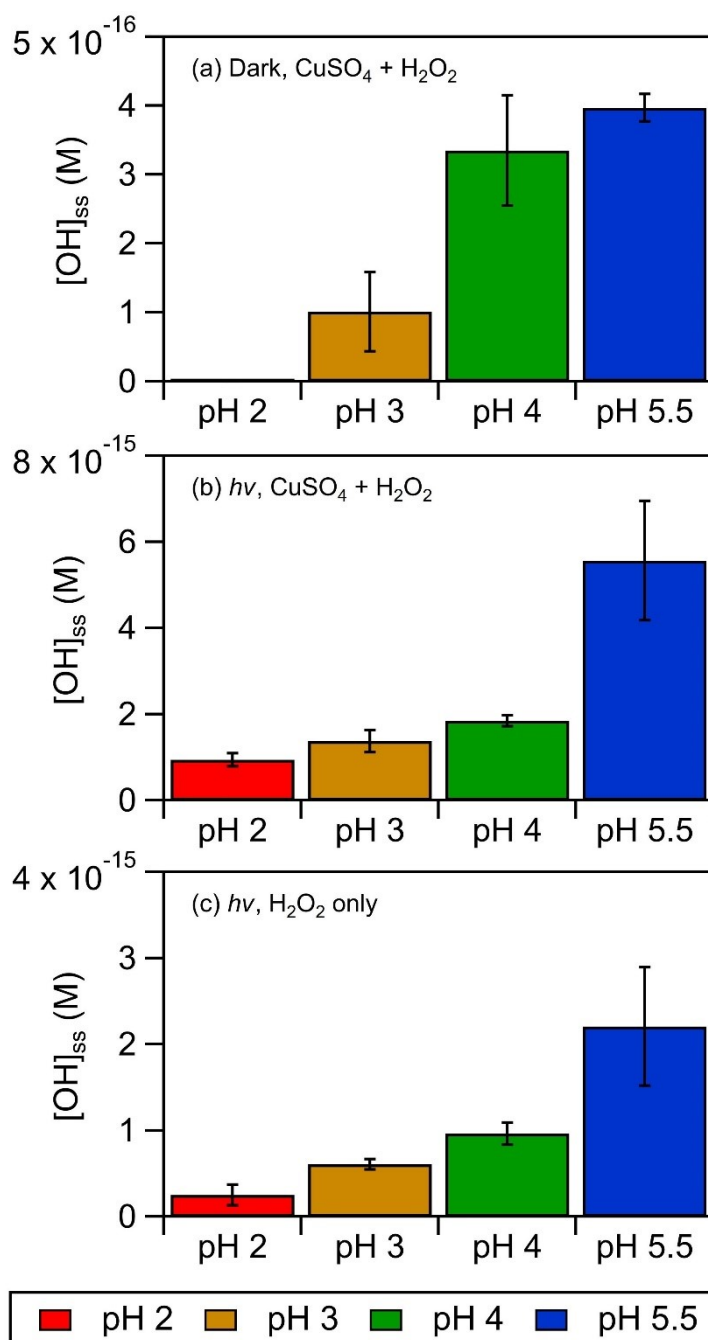

145

146 **Figure S4.** Estimated  $[\cdot\text{OH}]_{\text{ss}}$  in separate (a) dark oxidation and (b) photooxidation experiments  
 147 conducted under different pH conditions using solutions containing 50  $\mu\text{M}$  of benzoic acid (the  
 148 probe compound), 50  $\mu\text{M}$  of  $\text{Cu}(\text{II})$ , and 500  $\mu\text{M}$   $\text{H}_2\text{O}_2$ . We were unable to measure 4-  
 149 hydroxybenzoic acid in dark oxidation experiments at pH 2 since its concentrations were below  
 150 the detection limit (0.13  $\mu\text{M}$ ) of the instrument. Thus, we were unable to estimate  $[\cdot\text{OH}]_{\text{ss}}$  in  
 151 dark oxidation experiments at pH 2. Shown in (c) are the estimated  $[\cdot\text{OH}]_{\text{ss}}$  in photooxidation  
 152 experiments conducted under different pH conditions using solutions containing 50  $\mu\text{M}$  of  
 153 benzoic acid (the probe compound) and 500  $\mu\text{M}$   $\text{H}_2\text{O}_2$  but no 50  $\mu\text{M}$  of  $\text{Cu}(\text{II})$ . Error bars  
 154 indicate standard deviations from triplicate measurements.



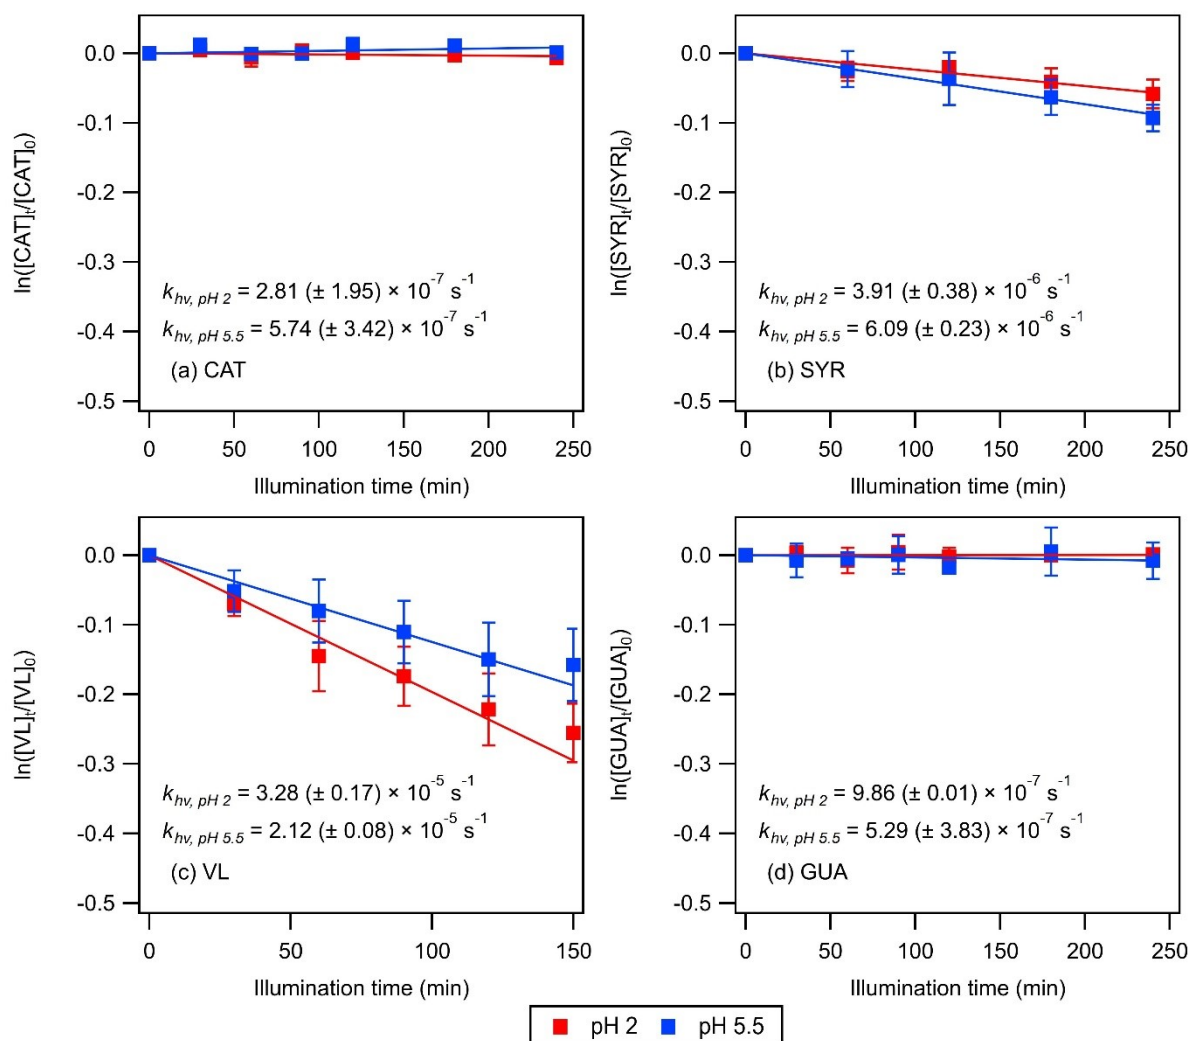

156

157 **Figure S5.** Decays of (a) catechol (CAT), (b) syringol (SYR), (c) vanillin (VL), and (d)  
 158 guaiacol (GUA) in solutions that did not contain Cu(II) and H<sub>2</sub>O<sub>2</sub> at pH 2 and 5.5 under  
 159 illumination conditions. Error bars indicate standard deviations from triplicate measurements.  
 160 Also shown are the  $k_{hv}$  values for the four PhCs.

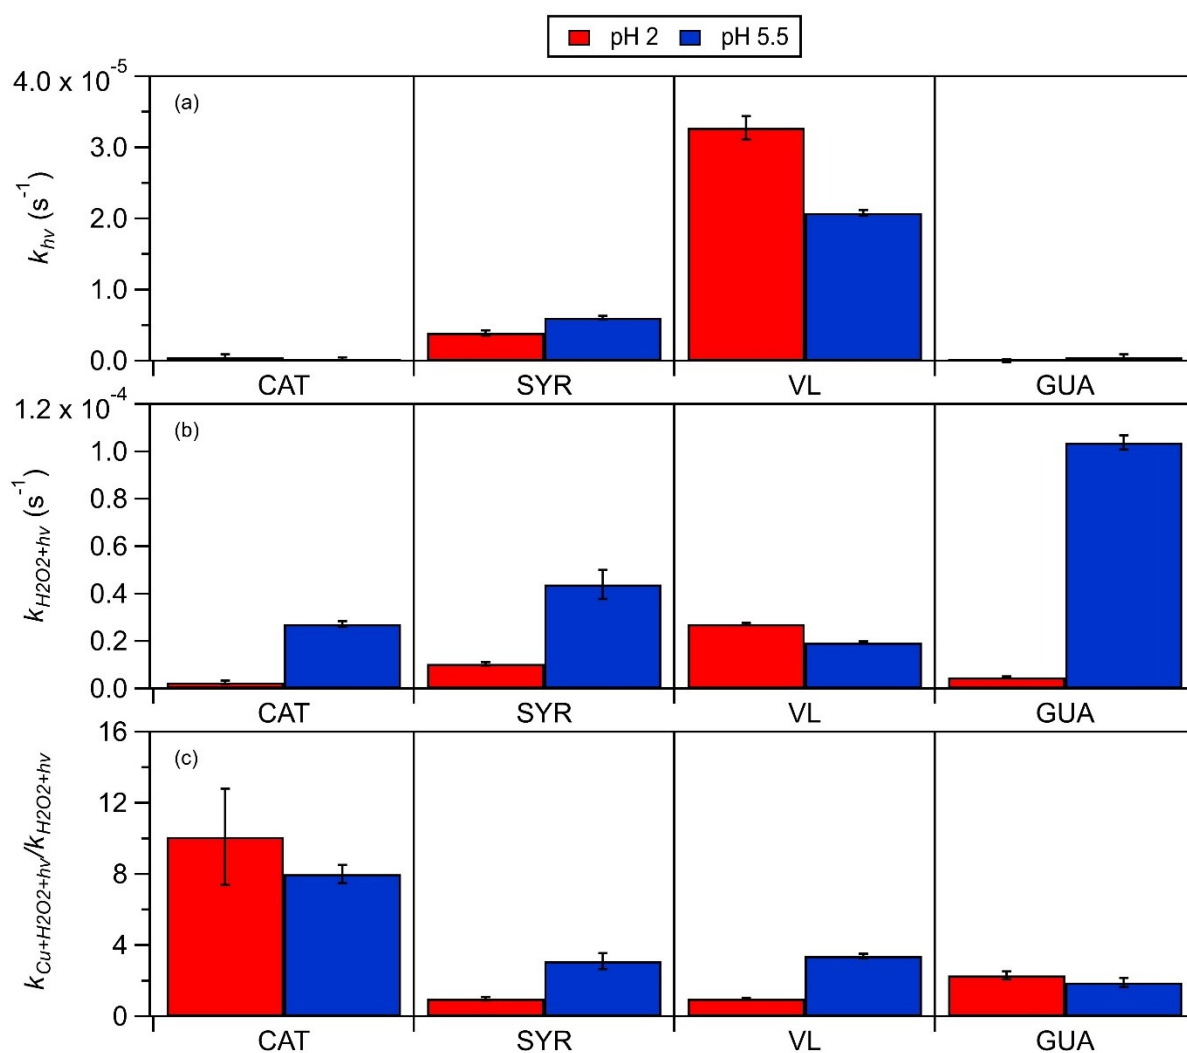

161

162 **Figure S6.** Comparison of the reaction rates ( $k_{hv}$  and  $k_{H_2O_2+hv}$ ) for catechol (CAT), syringol  
 163 (SYR), vanillin (VL), and guaiacol (GUA) at pH 2 and 5.5 in (a) direct photolysis experiments  
 164 (solutions did not contain Cu(II) and  $H_2O_2$ ), and (b)  $\cdot OH$  photooxidation experiments where  
 165 Cu(II) was absent (solutions did not contain Cu(II)). Panel (c) shows the ratios of reaction rates  
 166 ( $k_{Cu+H_2O_2+hv}/k_{H_2O_2+hv}$ ) obtained from photooxidation experiments that utilized solutions  
 167 containing Cu(II) and  $H_2O_2$  (Figure 2b) and photooxidation experiments that utilized solutions  
 168 containing  $H_2O_2$  only (Figure S4b). Error bars indicate standard deviations from triplicate  
 169 experiments and measurements.

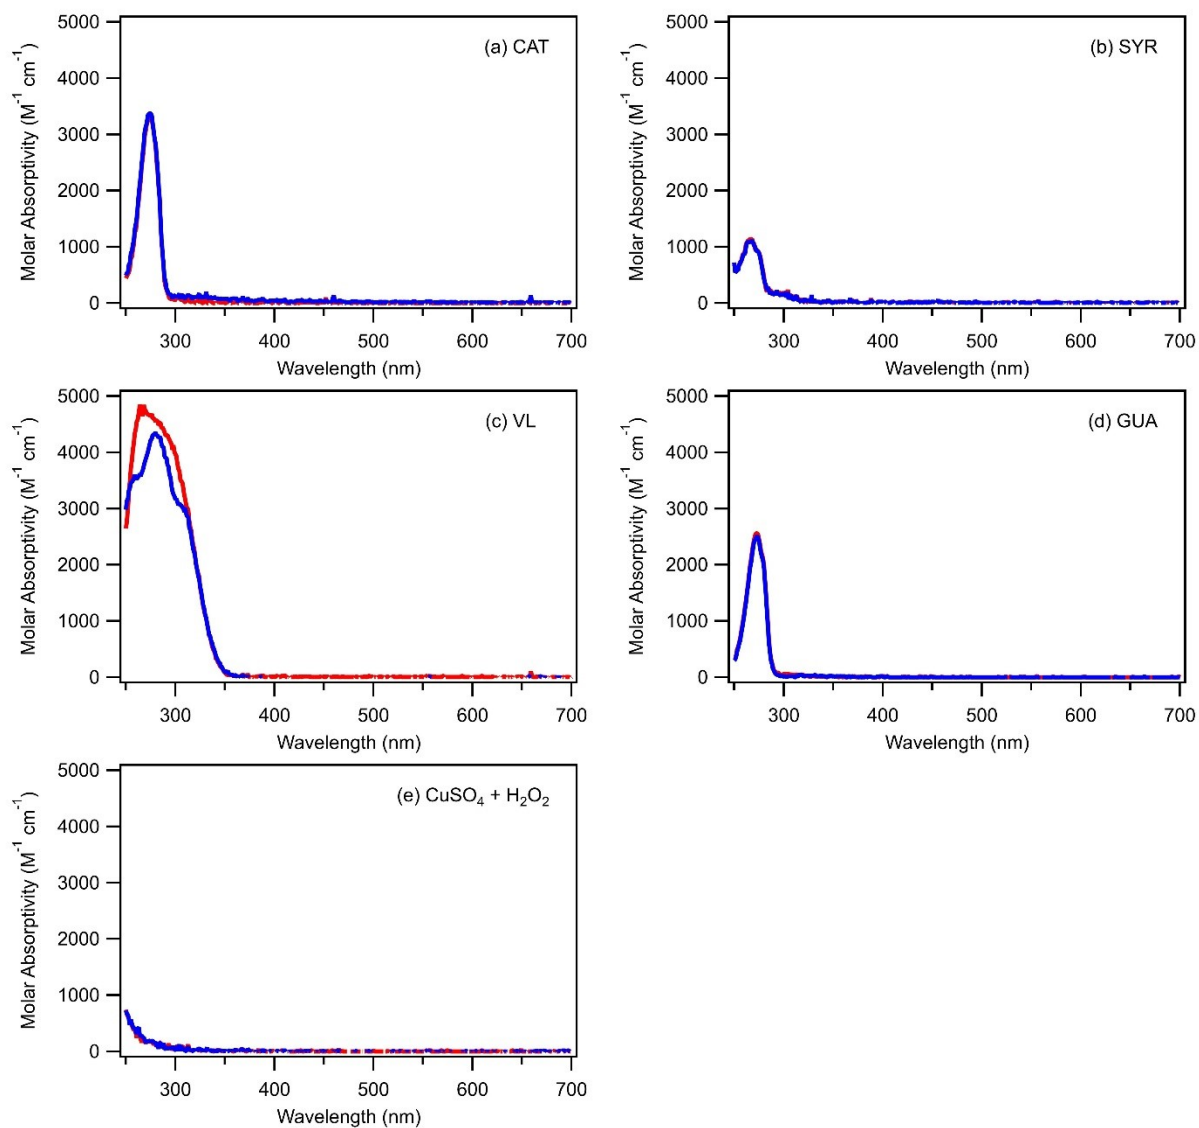

170

171 **Figure S7.** Absorption spectra of (a) 50  $\mu\text{M}$  catechol (CAT), (b) 50  $\mu\text{M}$  syringol (SYR), (c) 50  
 172  $\mu\text{M}$  vanillin (VL), and (d) 50  $\mu\text{M}$  guaiacol (GUA), (e) 50  $\mu\text{M}$  Cu(II) mixed with 500  $\mu\text{M}$  H<sub>2</sub>O<sub>2</sub>  
 173 solutions at pH 2 (red) and pH 5.5 (blue) at reaction time = 0 min.

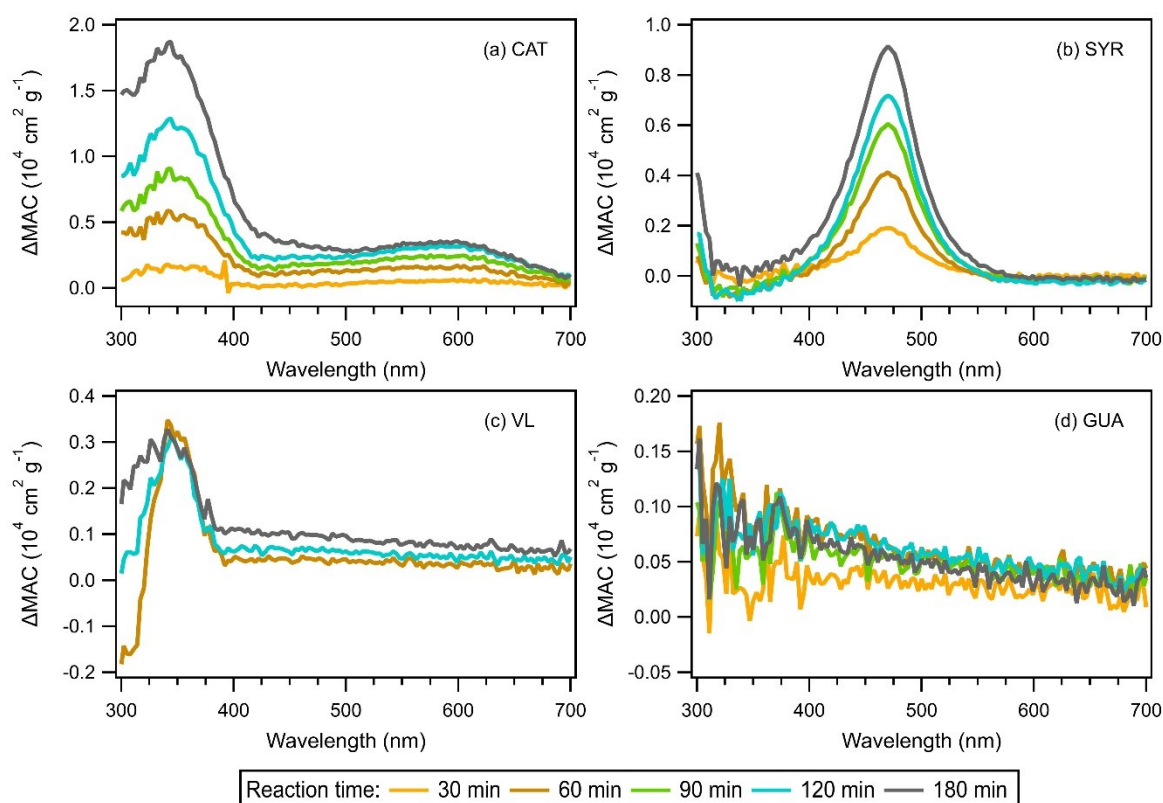

174

175 **Figure S8.** Background-subtracted MAC values in the near-UV and visible wavelength range  
 176 (i.e.,  $\Delta MAC = MAC_t - MAC_{2\ min}$ ) for (a) catechol (CAT), (b) syringol (SYR), (c) vanillin (VL), and  
 177 (d) guaiacol (GUA) under dark oxidation conditions at pH 5.5. All the solutions contained  
 178 Cu(II) and H<sub>2</sub>O<sub>2</sub>. Note that measurements were only taken at reaction times = 0 min, 60 min,  
 179 120 min, and 180 min for vanillin.

180

181

182

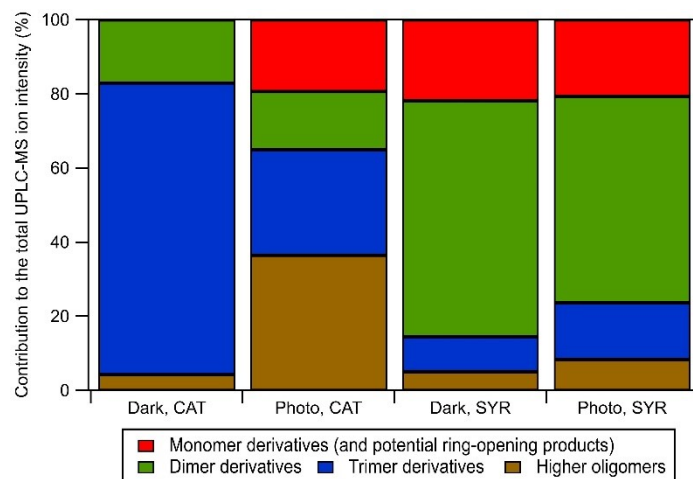

183

184 **Figure S9.** Comparison of the total UPLC-MS ion signals contributed by different product  
 185 classifications for catechol (CAT) and syringol (SYR) under dark oxidation and photooxidation  
 186 conditions at pH 5.5. All the solutions contained Cu(II) and H<sub>2</sub>O<sub>2</sub>. UPLC-MS measurements  
 187 were taken at the time points at which the background-subtracted integrated MAC (300 to 700  
 188 nm) peaked.

189

190

191

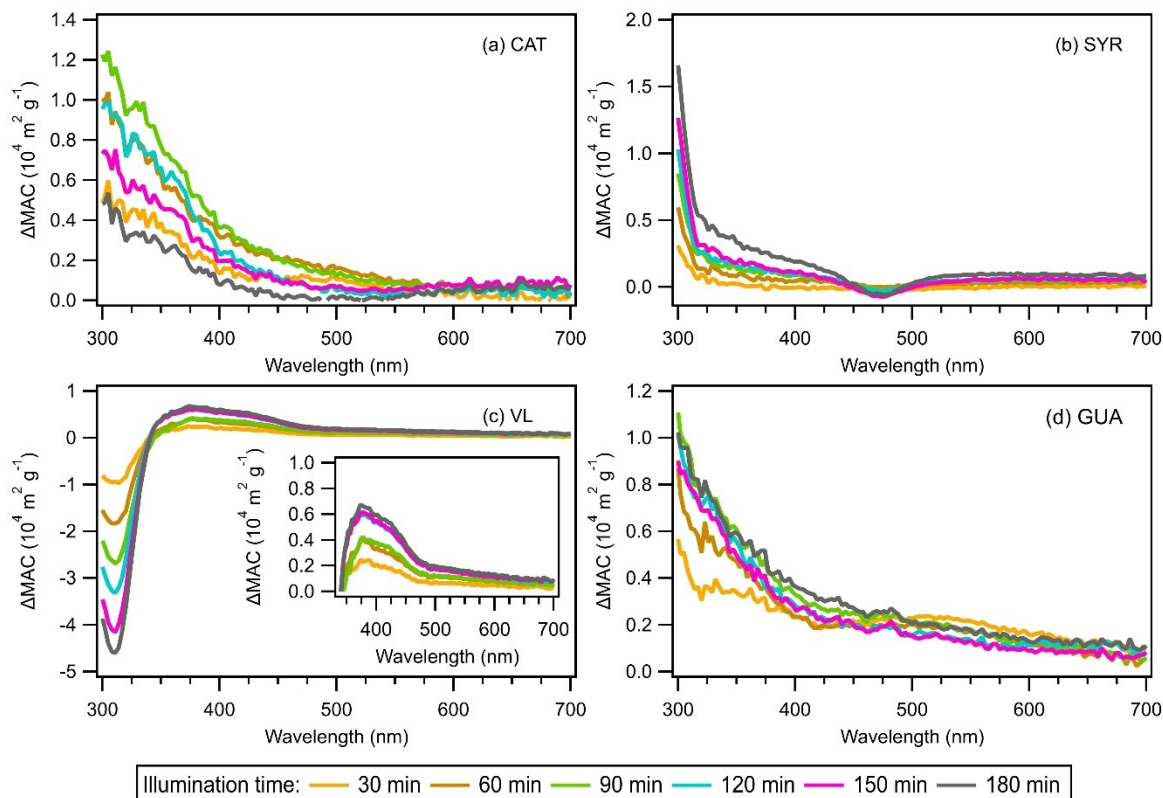

192

193 **Figure S10.** Background-subtracted MAC values in the near-UV and visible wavelength range  
 194 (i.e.,  $\Delta MAC = MAC_t - MAC_{0 min}$ ) for (a) catechol (CAT), (b) syringol (SYR), (c) vanillin (VL), and  
 195 (d) guaiacol (GUA) under photooxidation conditions at pH 5.5. Also shown is the magnified  
 196 view of the background-subtracted MAC values from 340 to 700 nm for syringol. All the  
 197 solutions contained Cu(II) and H<sub>2</sub>O<sub>2</sub>.

198

## 199 References

- 200 1. H. Lee, H.-J. Lee, D. L. Sedlak and C. Lee, pH-Dependent reactivity of oxidants formed  
 201 by iron and copper-catalyzed decomposition of hydrogen peroxide, *Chemosphere*,  
 202 2013, **92**, 652-658.  
 203 2. H.-J. Lee, H. Lee and C. Lee, Degradation of diclofenac and carbamazepine by the  
 204 copper(II)-catalyzed dark and photo-assisted Fenton-like systems, *Chemical*  
 205 *Engineering Journal*, 2014, **245**, 258-264.

206
